# Supplementary material for: Lomitapide enhances cytotoxic effects of temozolomide in chemotherapy-resistant glioblastoma
Source: JCI journal article supplement (doi:10.1172/jci.insight.186703), 2025-07-22
Supplement: sd1 [file 1]

**Supplementary Figure S1.** Chemical structure of lomitapide (source: <https://www.selleckchem.com/products/lomitapide.html>).

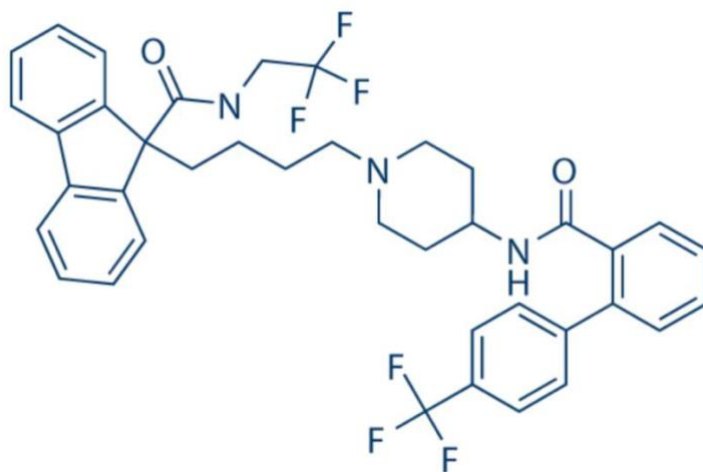

**Supplementary Figure S2. Bliss, HSA, Loewe, and ZIP synergy maps for (A) CTL-U251 and (B) TR-U251 cells.**

**A)**

**U251**

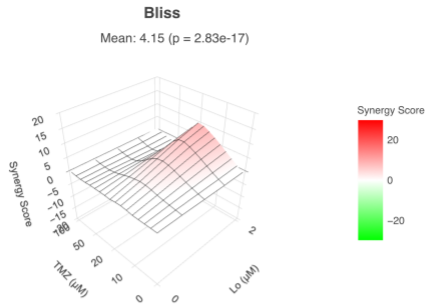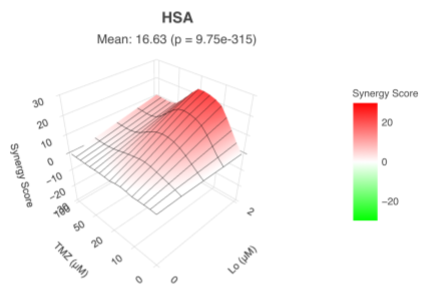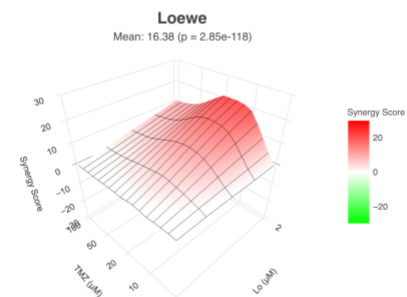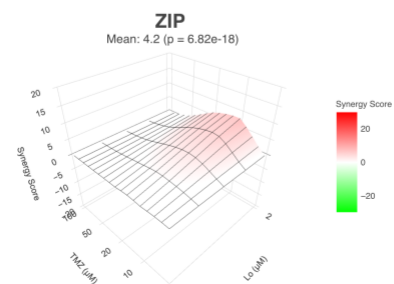

**B)**

**TR-U251**

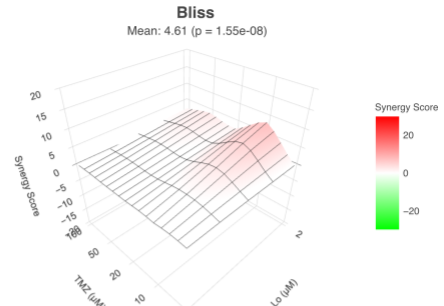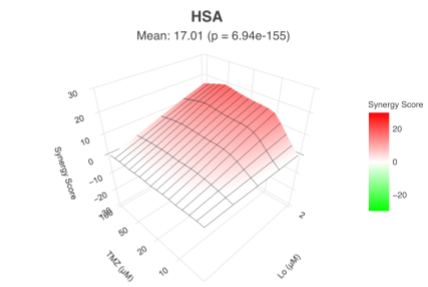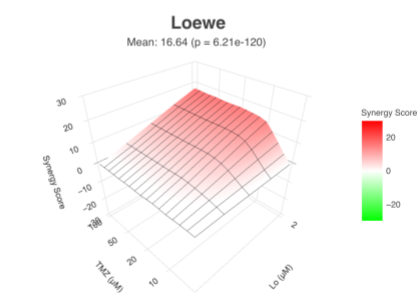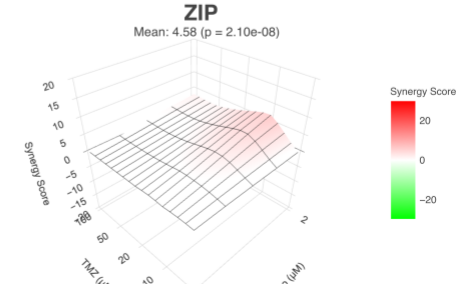

**Supplementary Figure S3.** Gating strategy for flow cytometry analysis of CTL-U251 cells. Viable cells were selected from a forward scatter-area vs side scatter-area dot plot, and single cells were subsequently selected in a forward scatter-area vs forward scatter-area dot plot. Then, lipid peroxidation-positive cells were selected by AF488 signal. **(A)** untreated unstained control; **(B)** untreated AF488+; **(C)** positive control unstained; **(D)** CTL-U251 24-hr lomitapide (2 $\mu$ M) treatment; **(E)** CTL-U251 48-hr lomitapide (2 $\mu$ M) treatment; **(F)** positive control AF488+.

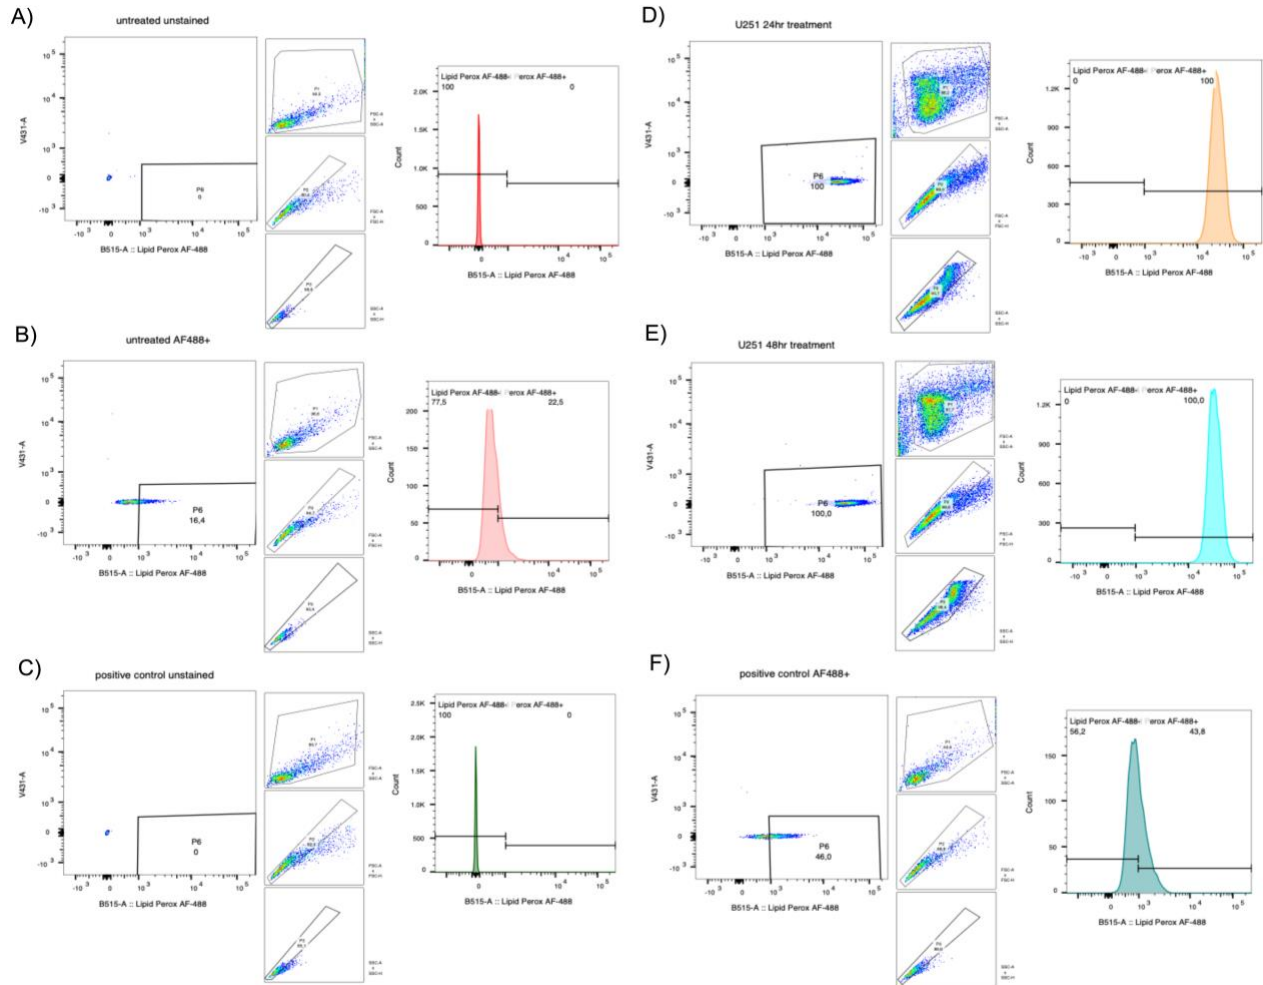

**Supplemental Table S1.** Lead candidates identified through the high-throughput drug screen of FDA-approved agents capable of crossing the blood-brain barrier.

| drug name                       | drug type                                                                           | mechanism of action                                                                                                                                                                                                                                                                                                                                                                                                                                                             | ability to cross the BBB | reference                                                                                                                                                                                                                                                                                                           |
|---------------------------------|-------------------------------------------------------------------------------------|---------------------------------------------------------------------------------------------------------------------------------------------------------------------------------------------------------------------------------------------------------------------------------------------------------------------------------------------------------------------------------------------------------------------------------------------------------------------------------|--------------------------|---------------------------------------------------------------------------------------------------------------------------------------------------------------------------------------------------------------------------------------------------------------------------------------------------------------------|
| pralatrexate                    | folate analog<br>metabolic inhibitor<br>antineoplastic agent                        | Competitively inhibits dihydrofolate reductase (DHFR) and polyglutamylation by the enzyme folylpolyglutamyl synthetase (FPGS) in cells expressing reduced folate carrier type 1 (RFC-1). results in the inhibition of RNA synthesis, DNA replication and cancer growth and apoptosis                                                                                                                                                                                            | +                        | National Center for Biotechnology Information. PubChem Compound Summary for CID 148121, Pralatrexate. <a href="https://pubchem.ncbi.nlm.nih.gov/compound/Pralatrexate">https://pubchem.ncbi.nlm.nih.gov/compound/Pralatrexate</a> . Accessed Oct. 3, 2023.                                                          |
| dronedarone                     | antiarrhythmic agent                                                                | Multichannel blocker (Na, K, and Ca ion channels and inhibiting $\beta$ -adrenergic receptors) that controls rhythm and rate in atrial fibrillation                                                                                                                                                                                                                                                                                                                             | +                        | National Center for Biotechnology Information. PubChem Compound Summary for CID 208898, Dronedarone. <a href="https://pubchem.ncbi.nlm.nih.gov/compound/Dronedarone">https://pubchem.ncbi.nlm.nih.gov/compound/Dronedarone</a> . Accessed Oct. 3, 2023.                                                             |
| lomitapide                      | lipid-lowering agent                                                                | microsomal triglyceride transfer protein inhibitor used to lower cholesterol associated with homozygous familial hypercholesterolemia (HoFH), reducing risk of cardiovascular events such as myocardial infarction and stroke                                                                                                                                                                                                                                                   | +                        | National Center for Biotechnology Information. PubChem Compound Summary for CID 9853053, Lomitapide. <a href="https://pubchem.ncbi.nlm.nih.gov/compound/Lomitapide">https://pubchem.ncbi.nlm.nih.gov/compound/Lomitapide</a> . Accessed Oct. 3, 2023.                                                               |
| ethacridine lactate monohydrate | anti-infective agent                                                                | DNA intercalating agent, indirectly inhibits poly(ADP-ribose) glycohydrolase (PARG) by forming a complex with PAR                                                                                                                                                                                                                                                                                                                                                               | +                        | National Center for Biotechnology Information. PubChem Compound Summary for CID 165457, Ethacridine lactate monohydrate. <a href="https://pubchem.ncbi.nlm.nih.gov/compound/Ethacridine-lactate-monohydrate">https://pubchem.ncbi.nlm.nih.gov/compound/Ethacridine-lactate-monohydrate</a> . Accessed Oct. 3, 2023. |
|                                 |                                                                                     | and blocking the binding of PARG to substrate                                                                                                                                                                                                                                                                                                                                                                                                                                   |                          |                                                                                                                                                                                                                                                                                                                     |
| delanzomib                      | P2 threonine boronic acid inhibitor                                                 | Chymotrypsin-like activity of the proteasome, with potential antineoplastic activity. Represses the proteasomal degradation of a variety of proteins, including I $\kappa$ B $\alpha$ resulting in the cytoplasmic sequestration of the transcription factor NF- $\kappa$ B; inhibition of NF- $\kappa$ B nuclear translocation and transcriptional up-regulation of a variety of cell growth-promoting factors; and apoptotic cell death in susceptible tumor cell populations | +                        | National Center for Biotechnology Information. PubChem Compound Summary for CID 24800541, Delanzomib. <a href="https://pubchem.ncbi.nlm.nih.gov/compound/Delanzomib">https://pubchem.ncbi.nlm.nih.gov/compound/Delanzomib</a> . Accessed Oct. 3, 2023.                                                              |
| omipalisib                      | small-molecule pyridylsulfonamide inhibitor of phosphatidylinositol 3-kinase (PI3K) | Binds to and inhibits PI3K in the PI3K/mTOR signaling pathway, which may trigger the translocation of cytosolic Bax (member of the proapoptotic Bcl2 family of proteins) to the mitochondrial outer membrane, increasing mitochondrial membrane permeability and inducing apoptotic cell death                                                                                                                                                                                  | +                        | National Center for Biotechnology Information. PubChem Compound Summary for CID 25167777, Omipalisib. <a href="https://pubchem.ncbi.nlm.nih.gov/compound/Omipalisib">https://pubchem.ncbi.nlm.nih.gov/compound/Omipalisib</a> . Accessed Oct. 3, 2023.                                                              |
| tivantinib                      | small molecule inhibitor of c-Met                                                   | Binds to the c-Met protein and disrupts c-Met signal transduction pathways, which may induce cell death in tumor cells overexpressing or expressing constitutively activated c-Met protein                                                                                                                                                                                                                                                                                      | +                        | National Center for Biotechnology Information. PubChem Compound Summary for CID 11494412, Tivantinib. <a href="https://pubchem.ncbi.nlm.nih.gov/compound/Tivantinib">https://pubchem.ncbi.nlm.nih.gov/compound/Tivantinib</a> . Accessed Oct. 3, 2023.                                                              |

## Supplementary Methods

### HILIC Chromatography

UHPLC: Thermo Scientific Ultimate 3000

Column: Waters Atlantis Premier BEH Z-HILIC 1.7  $\mu\text{m}$ , 2.1 x 100 mm (equipped with guard column)

Column Temperature: 40degC

Autosampler temperature: 5degC

Injection Volume: 10uL

Solvent A: 15mM Ammonium Bicarbonate pH 9 in water

Solvent B: 15mM Ammonium Bicarbonate pH 9 in 90% water, 10% H<sub>2</sub>O

Flow Rate: 500uL/min

Gradient: 0min @ 90%B, 0-5min gradient to 65%B, 5-6min @ 65%B. 6-7min gradient to 90%B, 7-13min @ 90%B

### Mass Spectrometer Settings

Mass Spectrometer: Thermo Scientific Q Exactive

Source: HESI II

Spray Voltage: 3.5kV

Capillary Temperature: 320degeC

Sheath Gas: 40

Aux Gas: 20

Spare Gas: 5

S-Lens RF level: 55

### Full MS

m/z range: 70-1000

Resolution: 70,000

AGC Target: 3e6

Maximum IT: 200ms

Polarity: positive and negative (polarity switching)

### Data-dependent MS2:

Resolution: 17,500

AGC Target: 1e5

Maximum IT: 50ms

TopN: 10

Isolation Window: 0.4m/z

Normalized Collision energy: 35

### Data Processing:

#### Non-targeted:

Software: Thermo Scientific Compound Discoverer 3.2

Databases: HMDB/KEGG/BioCyc, mzCloud

Ppm error window: 5ppm

Targeted: mevalonic acid (m/z 147.0663, negative mode)

Software: Thermo Scientific Xcalibur 4.5, Qual Browser  
Ppm error window: 5ppm

## Key resources

| REAGENT or RESOURCE                           | SOURCE                                         | IDENTIFIER | RRID        |
|-----------------------------------------------|------------------------------------------------|------------|-------------|
| Antibodies                                    |                                                |            |             |
| Actin                                         | Cell Signaling Technology                      | SC-4967S   | AB_330288   |
| DMT1/SLC11A2 (D3V8G)                          | Cell Signaling Technology                      | SC-15083   | AB_2798699  |
| GPX4                                          | Cell Signaling Technology                      | SC-52455   | AB_2924984  |
| HMGCR                                         | Abcam                                          | ab242315   | AB_2928124  |
| xCT/SLC7A11 (D2M7A)                           | Cell Signaling Technology                      | SC-12691   | AB_2687474  |
| KEAP1 (D6B12)                                 | Cell Signaling Technology                      | SC-8047    | AB_10860776 |
| MTTP                                          | Abcam                                          | AB75316    | AB_1310473  |
| Chemicals, peptides, and recombinant proteins |                                                |            |             |
| Matrigel                                      | Corning                                        | 354234     |             |
| BCA                                           | Pierce Chemical Co. (Thermo Fisher Scientific) | 23225      |             |
| ABC Reagent Kit                               | Vector Labs                                    | PK-4000    |             |
| DAB chromogen                                 | Vector LabsD                                   | SK-4100    |             |
| PBS                                           | Wisent                                         | 331-010-EL |             |
| Antibiotic + antimycotic                      | Wisent                                         | 450-115-EL |             |
| N2 Supplement                                 | Gibco                                          | 17502-048  |             |
| Anti-rabbit HRP                               | Cell Signaling Technology                      | 7074S      | AB_2099233  |
| Anti-mouse HRP                                | Cell Signaling Technology                      | 7076S      | AB_330924   |
| DMSO                                          | Sigma                                          | 276855     |             |

|                                                                |                                        |             |           |
|----------------------------------------------------------------|----------------------------------------|-------------|-----------|
| Temozolomide                                                   | Sigma                                  | T2577       |           |
| Lomitapide                                                     | Sigma                                  | SML1385     |           |
| bFGF                                                           | Sigma                                  | F0291       |           |
| EGF                                                            | Sigma                                  | E9644       |           |
| DMEM                                                           | Wisent                                 | 319-005-CL  |           |
| DMEM F12                                                       | Wisent                                 | 319-075-CL  |           |
| B27                                                            | Sigma                                  | 17504044    |           |
| Penn strep                                                     | Wisent                                 | 450-201-EL  |           |
| L-Glut                                                         | Wisent                                 | 609-065-EL  |           |
| FBS                                                            | Wisent                                 | 920-040     |           |
| Trypsin/EDTA 0.05%                                             | Wisent                                 | 325-542-EL  |           |
| Accutase solution                                              | Sigma                                  | A6964       |           |
| Puromycin                                                      | Sigma                                  | P8833       |           |
| Neomycin                                                       | Sigma                                  | N6386       |           |
| Complete mini EDTA-free<br>protease inhibitor cocktail tablets | Roche                                  | 11836170001 |           |
| D-Luciferin                                                    | PerkinElmer                            | 122799      |           |
| ECL kit                                                        | PerkinElmer                            | ORT2655     |           |
| Critical commercial assays                                     |                                        |             |           |
| CellTiter-Blue cell viability<br>reagent                       | Promega                                | G8081       |           |
| Cellular ROS assay kit                                         | Abcam                                  | AB113851    |           |
| Cholesterol uptake assay kit                                   | Abcam                                  | AB236212    |           |
| Human Coenzyme Q <sub>10</sub> (CoQ <sub>10</sub> )            | Cusabio                                | CSB-E14081h |           |
| ELISA                                                          | Abcam                                  | AB102530    |           |
| Glutathione Peroxidase Assay<br>Kit (Colorimetric)             |                                        |             |           |
| Experimental models: Cell lines                                |                                        |             |           |
| U251 MG                                                        | Sigma                                  | 09063001    | CVCL_0021 |
| H818                                                           | Dr. Frederick<br>Lang, M.D<br>Anderson |             |           |

G811 (Houston, Texas)  
 Dr. Frederick Lang, M.D  
 Anderson (Houston, Texas)

GLiNS1 Dr. Peter Dirks,  
 Hospital for Sick Children  
 (Toronto, Canada)

Experimental models:

Organisms/strains

|                            |                        |        |                 |
|----------------------------|------------------------|--------|-----------------|
| NOD <i>SCID</i> gamma mice | The Jackson Laboratory | 005557 | IMSR_JAX:005557 |
|----------------------------|------------------------|--------|-----------------|

Software and algorithms

|                   |             |  |            |
|-------------------|-------------|--|------------|
| PRISM             | GraphPad    |  | SCR_005375 |
| ImageJ            | NIH         |  | SCR_003070 |
| Halo              | Indica Labs |  | SCR_018350 |
| FlowJo            | BD          |  | SCR_008520 |
| Affinity Designer | Serif       |  | SCR_016952 |
